# Supplementary material for: Highly sensitive methane catalytic combustion micro-sensor based on mesoporous structure and nano-catalyst
Source: Royal Society of Chemistry journal article supplement (doi:10.1039/c3nr02916f), 2013-01-01
Supplement: c3nr02916f.pdf [file c3nr02916f.pdf]

Electronic Supplementary Information:

## High Sensitive Methane Catalytic Combustion Micro-Sensor Based on Mesoporous Structure and Nano-Catalyst

Jiacan Su<sup>a</sup>, Liehu Cao<sup>a</sup>, Liang Li<sup>\*b</sup>, Jie Wei<sup>b</sup>, Gengnan Li<sup>b</sup>, Yinyin Yuan<sup>b</sup>

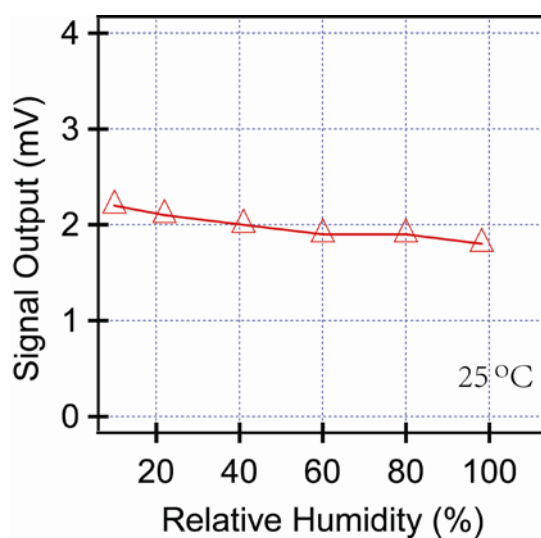

Fig. 1 Effect of the temperature on the signal output of the sensor (10% LEL).

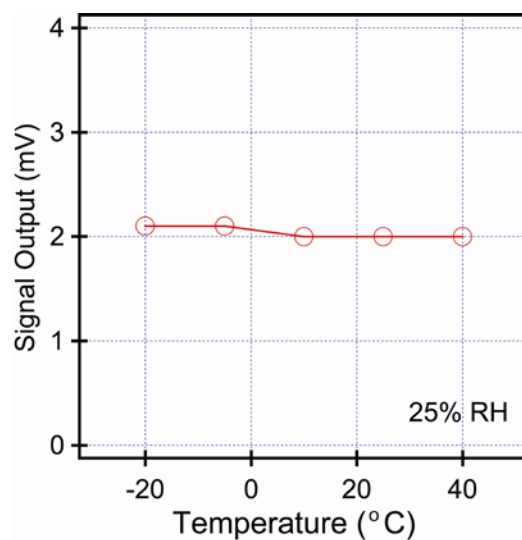

Fig. 2 Effect of the relative humidity on the signal output of the sensor (10% LEL).

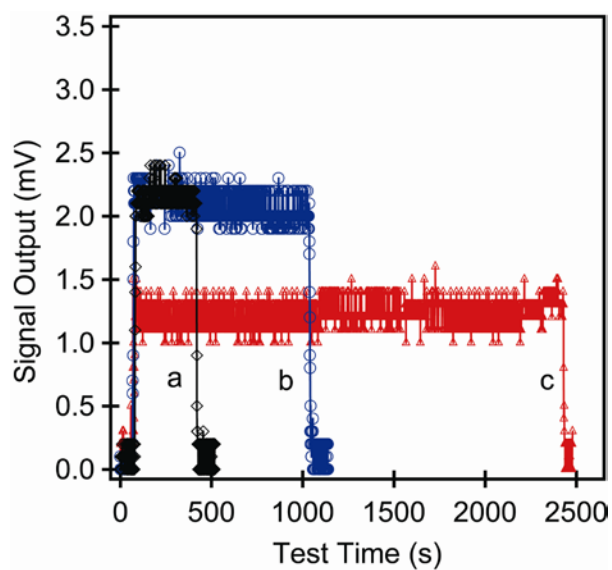

**Fig. 3** Response of the sensor (10% LEL) before (a) and after (b) the exposure to 100 ppm H<sub>2</sub>S, and the response under the exposure to 100 ppm H<sub>2</sub>S mixed with 10% LEL methane (c).

Table 1 T<sub>90</sub> response time at different CH<sub>4</sub> concentration

| CH <sub>4</sub> Concentration     | 10%LEL | 30%LEL | 50%LEL | 70%LEL | 90%LEL |
|-----------------------------------|--------|--------|--------|--------|--------|
| T <sub>90</sub> Response time (s) | 7      | 5      | 5      | 6      | 5      |
